# Supplementary figures and images for: GNA14 Stimulation of KLF7 Promotes Malignant Growth of Endometrial Cancer Through Upregulation of HAS2
Source: Research Square preprint supplement (doi:10.21203/rs.3.rs-113265/v1), 2020-11-25

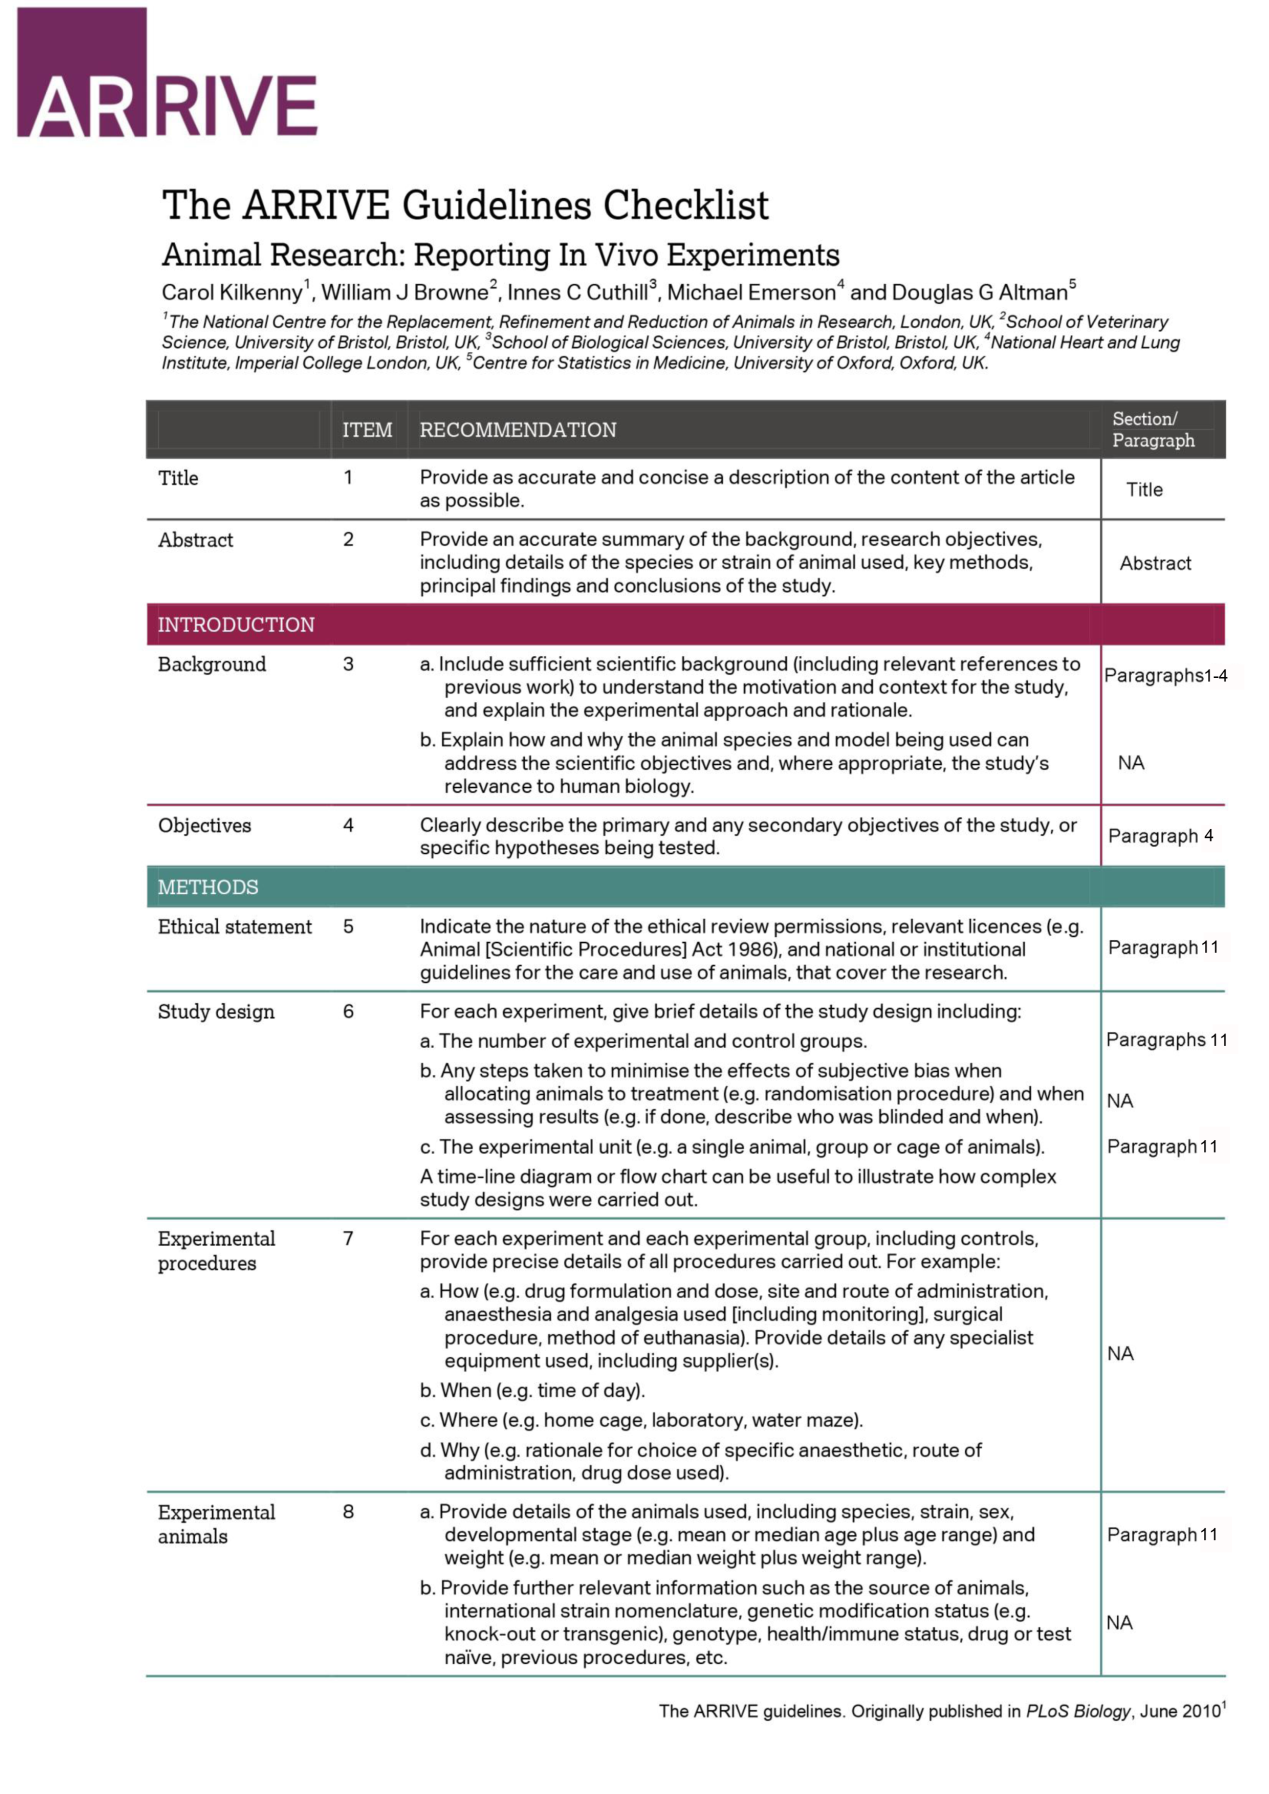


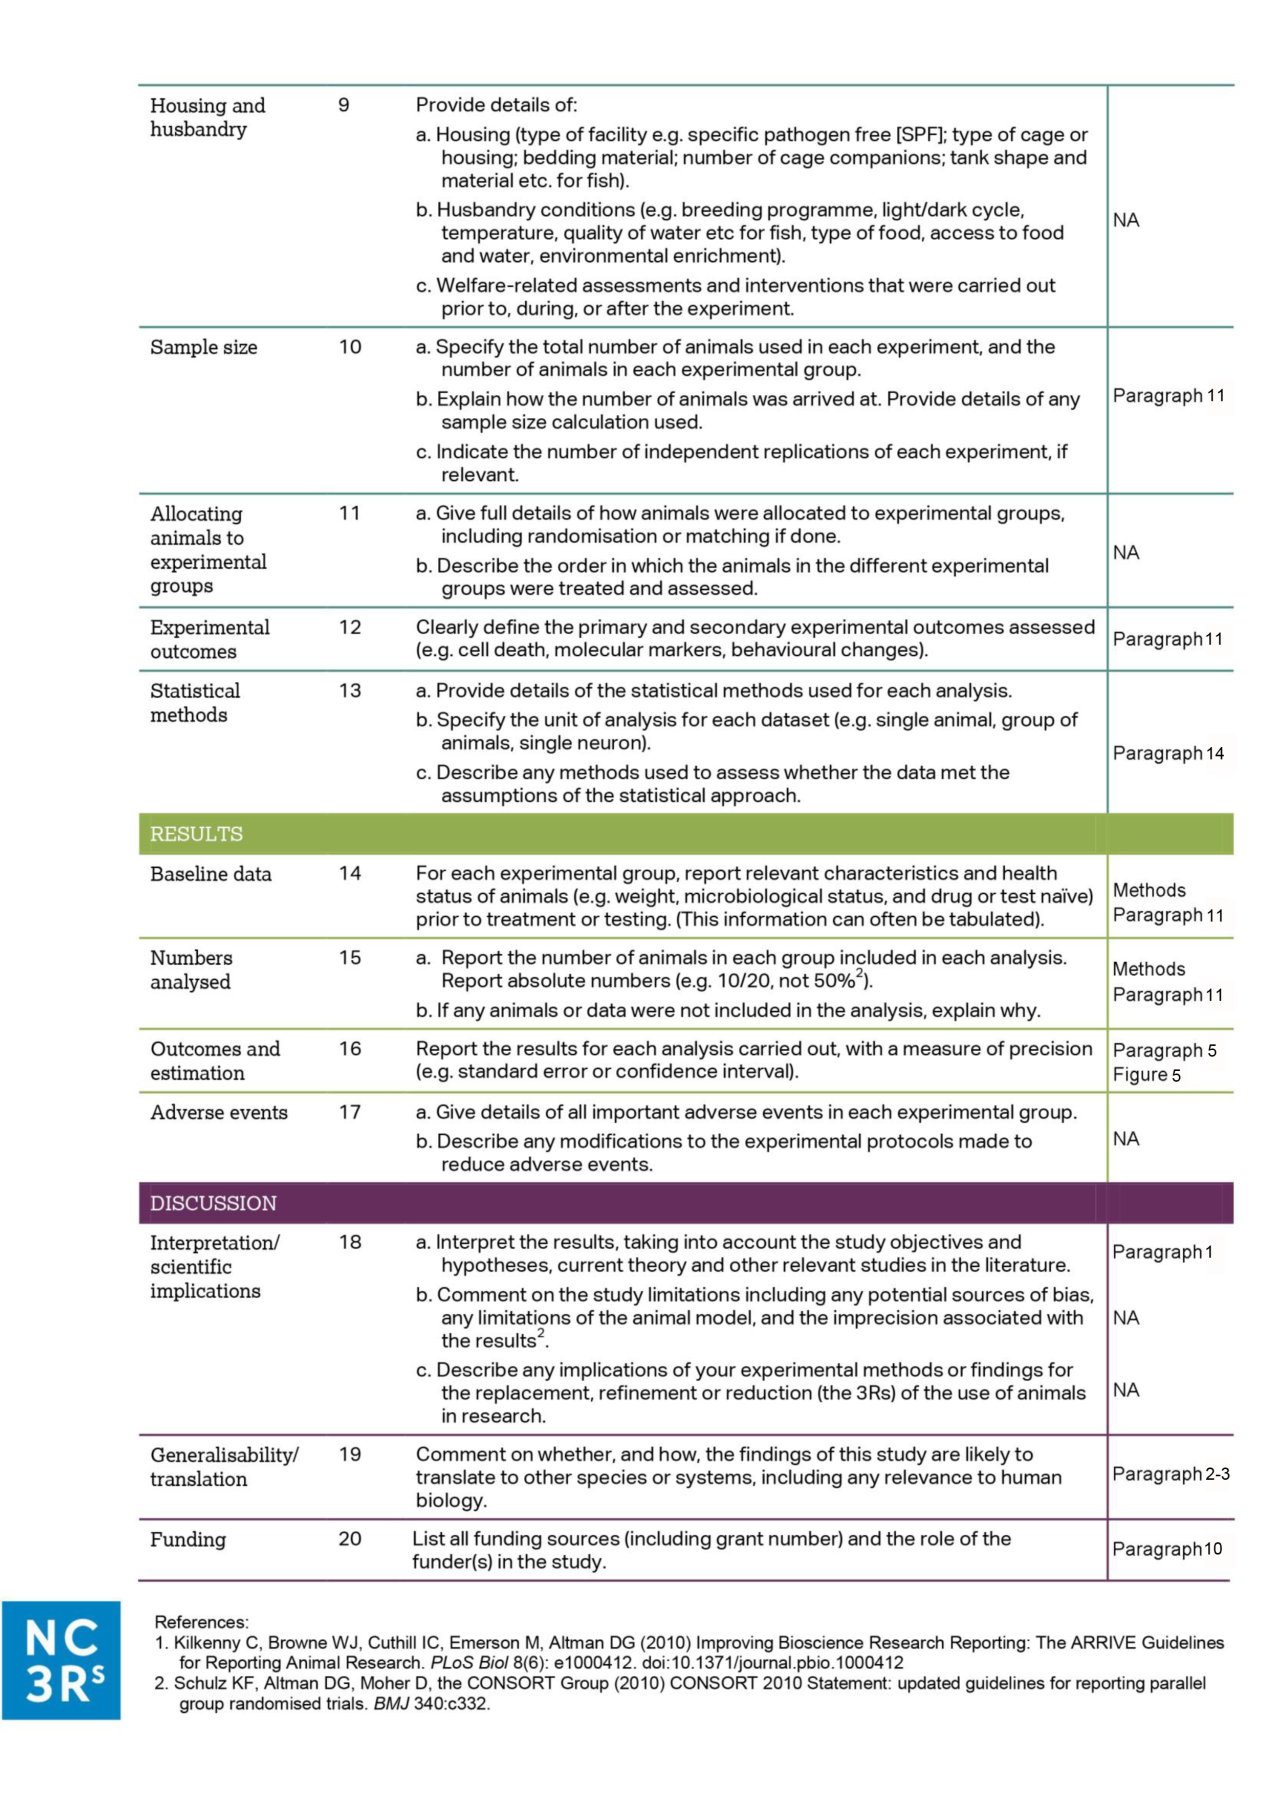

Supplement: Supplementary file 1 [file 3c74b37a2a263e0adbd774de.docx]
